# Supplementary material for: Global Population Genetic Analysis of Aspergillus fumigatus
Source: mSphere. 2017 Feb 1;2(1):e00019-17. doi: 10.1128/mSphere.00019-17 (PMC5288565; doi:10.1128/mSphere.00019-17)
Supplement: FIG S2 [file sph001172230sf2.pdf]

## Results of Analysis of Molecular Variance

Data Sheet File S2  
Data Title Eco separation

No. Samples 1592  
No. Pops 4  
No. Permutations 999  
NO 313.448  
SSTOT 6187.791

| Pop  | Air      | Clinical | Soil    | Water   |
|------|----------|----------|---------|---------|
| n    | 529      | 858      | 117     | 88      |
| SSWP | 2060.386 | 3325.593 | 381.051 | 300.159 |

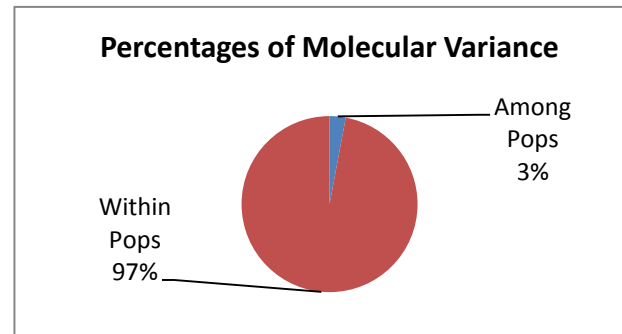

## Summary AMOVA Table

| Source      | df   | SS       | MS     | Est. Var. | %    |
|-------------|------|----------|--------|-----------|------|
| Among Pops  | 3    | 120.602  | 40.201 | 0.116     | 3%   |
| Within Pops | 1588 | 6067.189 | 3.821  | 3.821     | 97%  |
| Total       | 1591 | 6187.791 |        | 3.937     | 100% |

Stat Value P(rand >= data) Probability, P(rand >= data), for PhiPT is based on standard permutation across the full data set.

PhiPT 0.029 0.001  $\text{PhiPT} = \text{AP} / (\text{WP} + \text{AP}) = \text{AP} / \text{TOT}$

PhiPT max 0.158

Phi'PT 0.187

Nm (Haploid) 16.459  $\text{Nm (Haploid)} = [(1 / \text{PhiPT}) - 1] / 2$

Key: AP = Est. Var. Among Pops, WP = Est. Var. Within Pops

## Pairwise Population PhiPT Values

|  | Air   | Clinical | Soil  | Water |          |
|--|-------|----------|-------|-------|----------|
|  |       | 0.001    | 0.001 | 0.001 | Air      |
|  | 0.005 |          | 0.001 | 0.001 | Clinical |
|  | 0.089 | 0.082    |       | 0.001 | Soil     |
|  | 0.032 | 0.034    | 0.115 |       | Water    |

PhiPT Values below diagonal. Probability, P(rand >= data) based on 999 permutations is shown above diagonal.
