# Supplementary material for: Global Population Genetic Analysis of Aspergillus fumigatus
Source: PubMed Central journal article supplement (PMC5288565; doi:10.1128/msphere.00019-17), 2017-02-01
Supplement: sph001172230sf1.pdf [file sph001172230sf1.pdf]

**Results of Analysis of Molecular Variance**

**Data Sheet** File S1  
**Data Title** Geo separation

**No. Samples** 2026  
**No. Pops** 13  
**No. Permutation:** 999  
**NO** 115.699  
**SSTOT** 7892.766

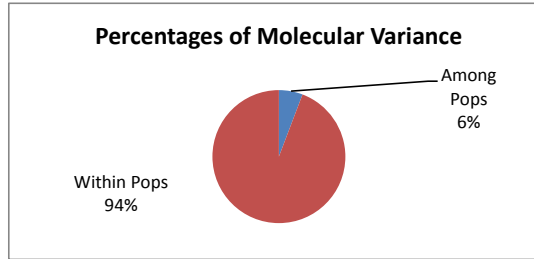

| Pop  | Australia | Belgium | China  | Cuba   | France  | Germany | India   | Italy  | Netherland | Norway  | Spain   | Switzerland | USA     |
|------|-----------|---------|--------|--------|---------|---------|---------|--------|------------|---------|---------|-------------|---------|
| n    | 7         | 108     | 8      | 10     | 66      | 85      | 94      | 7      | 1081       | 203     | 186     | 70          | 101     |
| SSWP | 20.000    | 397.843 | 21.625 | 34.600 | 248.515 | 313.235 | 222.117 | 20.286 | 4188.110   | 708.246 | 705.323 | 269.671     | 379.564 |

**Summary AMOVA Table**

| Source      | df   | SS       | MS     | Est. Var. | %    |
|-------------|------|----------|--------|-----------|------|
| Among Pops  | 12   | 363.630  | 30.303 | 0.230     | 6%   |
| Within Pops | 2013 | 7529.136 | 3.740  | 3.740     | 94%  |
| Total       | 2025 | 7892.766 |        | 3.970     | 100% |

Stat Value P(rand >= data) Probability, P(rand >= data), for PhiPT is based on standard permutation across the full data set.

PhiPT 0.058 0.001  $\text{PhiPT} = \text{AP} / (\text{WP} + \text{AP}) = \text{AP} / \text{TOT}$   
 PhiPT max 0.178  
 Phi'PT 0.325  
 Nm (Haploid) 8.146  $\text{Nm (Haploid)} = [(1 / \text{PhiPT}) - 1] / 2$

Key: AP = Est. Var. Among Pops, WP = Est. Var. Within Pops

**Pairwise Population PhiPT Values**

|  | Australia | Belgium | China | Cuba  | France | Germany | India | Italy | Netherland | Norway | Spain | Switzerland | USA   |             |
|--|-----------|---------|-------|-------|--------|---------|-------|-------|------------|--------|-------|-------------|-------|-------------|
|  |           | 0.038   | 0.001 | 0.032 | 0.008  | 0.015   | 0.001 | 0.050 | 0.005      | 0.001  | 0.025 | 0.010       | 0.011 | Australia   |
|  | 0.051     |         | 0.001 | 0.007 | 0.001  | 0.001   | 0.001 | 0.001 | 0.001      | 0.001  | 0.001 | 0.001       | 0.001 | Belgium     |
|  | 0.185     | 0.152   |       | 0.001 | 0.001  | 0.001   | 0.001 | 0.002 | 0.001      | 0.001  | 0.001 | 0.001       | 0.001 | China       |
|  | 0.068     | 0.049   | 0.163 |       | 0.030  | 0.021   | 0.001 | 0.113 | 0.027      | 0.001  | 0.019 | 0.024       | 0.014 | Cuba        |
|  | 0.075     | 0.035   | 0.115 | 0.035 |        | 0.001   | 0.001 | 0.009 | 0.001      | 0.001  | 0.001 | 0.003       | 0.001 | France      |
|  | 0.061     | 0.058   | 0.137 | 0.034 | 0.049  |         | 0.001 | 0.028 | 0.001      | 0.001  | 0.001 | 0.001       | 0.001 | Germany     |
|  | 0.357     | 0.225   | 0.375 | 0.297 | 0.183  | 0.273   |       | 0.001 | 0.001      | 0.001  | 0.001 | 0.001       | 0.001 | India       |
|  | 0.113     | 0.103   | 0.208 | 0.048 | 0.088  | 0.044   | 0.373 |       | 0.001      | 0.001  | 0.004 | 0.001       | 0.003 | Italy       |
|  | 0.050     | 0.021   | 0.115 | 0.028 | 0.015  | 0.034   | 0.180 | 0.068 |            | 0.001  | 0.001 | 0.017       | 0.001 | Netherland  |
|  | 0.095     | 0.051   | 0.162 | 0.082 | 0.063  | 0.083   | 0.230 | 0.138 | 0.032      |        | 0.001 | 0.001       | 0.001 | Norway      |
|  | 0.051     | 0.034   | 0.110 | 0.038 | 0.031  | 0.041   | 0.208 | 0.103 | 0.023      | 0.050  |       | 0.002       | 0.001 | Spain       |
|  | 0.046     | 0.021   | 0.107 | 0.029 | 0.017  | 0.036   | 0.218 | 0.081 | 0.005      | 0.033  | 0.012 |             | 0.001 | Switzerland |
|  | 0.068     | 0.060   | 0.120 | 0.044 | 0.053  | 0.054   | 0.257 | 0.105 | 0.044      | 0.074  | 0.037 | 0.035       |       | USA         |

PhiPT Values below diagonal. Probability, P(rand >= data) based on 999 permutations is shown above diagonal.
