# Supplementary material for: Global Population Genetic Analysis of Aspergillus fumigatus
Source: PubMed Central journal article supplement (PMC5288565; doi:10.1128/msphere.00019-17), 2017-02-01
Supplement: sph001172230sf3.pdf [file sph001172230sf3.pdf]

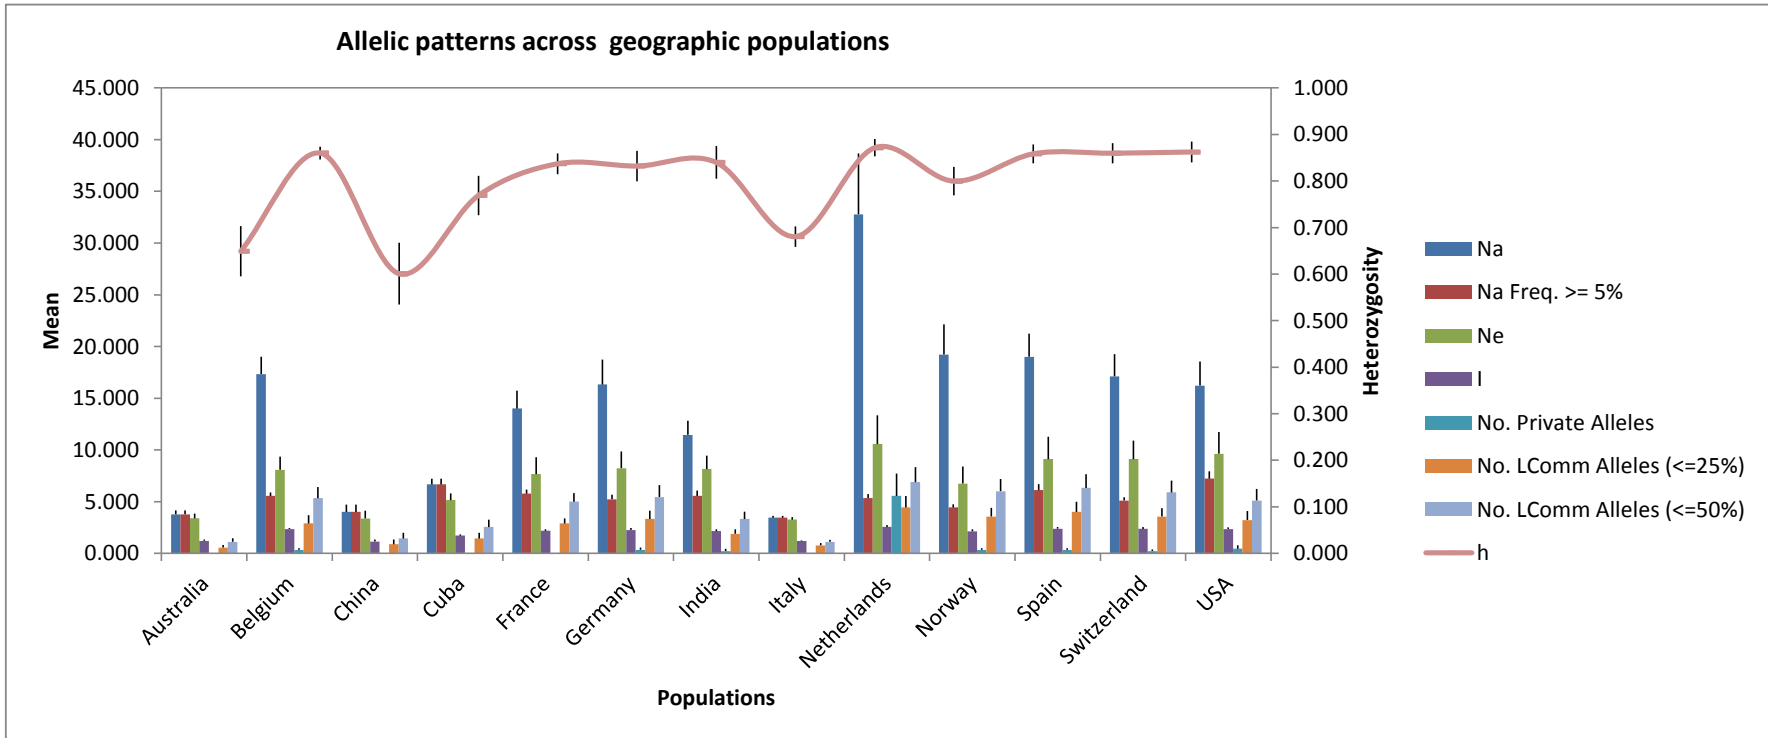

| Mean values               |           |         |       |       |        |         |        |       |             |        |        |             |        |
|---------------------------|-----------|---------|-------|-------|--------|---------|--------|-------|-------------|--------|--------|-------------|--------|
| Population                | Australia | Belgium | China | Cuba  | France | Germany | India  | Italy | Netherlands | Norway | Spain  | Switzerland | USA    |
| Na                        | 3.778     | 17.333  | 4.000 | 6.667 | 14.000 | 16.333  | 11.444 | 3.444 | 32.778      | 19.222 | 19.000 | 17.111      | 16.222 |
| Na Freq. >= 5%            | 3.778     | 5.556   | 4.000 | 6.667 | 5.778  | 5.222   | 5.556  | 3.444 | 5.333       | 4.444  | 6.111  | 5.111       | 7.222  |
| Ne                        | 3.381     | 8.075   | 3.378 | 5.158 | 7.659  | 8.232   | 8.155  | 3.259 | 10.563      | 6.745  | 9.111  | 9.117       | 9.621  |
| I                         | 1.205     | 2.352   | 1.141 | 1.709 | 2.183  | 2.265   | 2.153  | 1.194 | 2.551       | 2.142  | 2.389  | 2.367       | 2.353  |
| No. Private Alleles       | 0.000     | 0.333   | 0.000 | 0.000 | 0.000  | 0.333   | 0.222  | 0.000 | 5.556       | 0.333  | 0.333  | 0.222       | 0.444  |
| No. LComm Alleles (<=25%) | 0.556     | 2.889   | 0.889 | 1.444 | 2.889  | 3.333   | 1.889  | 0.778 | 4.444       | 3.556  | 4.000  | 3.556       | 3.222  |
| No. LComm Alleles (<=50%) | 1.111     | 5.333   | 1.444 | 2.556 | 5.000  | 5.444   | 3.333  | 1.111 | 6.889       | 6.000  | 6.333  | 5.889       | 5.111  |
| h                         | 0.649     | 0.860   | 0.601 | 0.769 | 0.837  | 0.832   | 0.840  | 0.681 | 0.872       | 0.800  | 0.858  | 0.860       | 0.862  |
| uh                        | 0.811     | 0.872   | 0.687 | 0.854 | 0.854  | 0.848   | 0.875  | 0.907 | 0.873       | 0.805  | 0.867  | 0.874       | 0.877  |

**Standard Error (SE) values**

| Population                | Australia | Belgium | China | Cuba  | France | Germany | India | Italy | Netherlands | Norway | Spain | Switzerland | USA   |
|---------------------------|-----------|---------|-------|-------|--------|---------|-------|-------|-------------|--------|-------|-------------|-------|
| Na                        | 0.364     | 1.675   | 0.707 | 0.553 | 1.732  | 2.392   | 1.365 | 0.176 | 5.883       | 2.900  | 2.255 | 2.163       | 2.332 |
| Na Freq. >= 5%            | 0.364     | 0.338   | 0.707 | 0.553 | 0.401  | 0.434   | 0.530 | 0.176 | 0.408       | 0.294  | 0.588 | 0.309       | 0.722 |
| Ne                        | 0.461     | 1.282   | 0.758 | 0.640 | 1.627  | 1.628   | 1.308 | 0.234 | 2.775       | 1.657  | 2.162 | 1.776       | 2.125 |
| I                         | 0.130     | 0.111   | 0.184 | 0.131 | 0.146  | 0.198   | 0.167 | 0.061 | 0.188       | 0.192  | 0.160 | 0.163       | 0.174 |
| No. Private Alleles       | 0.000     | 0.167   | 0.000 | 0.000 | 0.000  | 0.236   | 0.222 | 0.000 | 2.167       | 0.167  | 0.167 | 0.147       | 0.338 |
| No. LComm Alleles (<=25%) | 0.242     | 0.790   | 0.455 | 0.556 | 0.484  | 0.799   | 0.455 | 0.222 | 1.107       | 0.852  | 1.000 | 0.801       | 0.862 |
| No. LComm Alleles (<=50%) | 0.351     | 1.093   | 0.530 | 0.689 | 0.816  | 1.156   | 0.707 | 0.200 | 1.457       | 1.179  | 1.333 | 1.136       | 1.124 |
| h                         | 0.054     | 0.014   | 0.066 | 0.042 | 0.022  | 0.033   | 0.035 | 0.022 | 0.019       | 0.031  | 0.020 | 0.022       | 0.022 |
| uh                        | 0.068     | 0.014   | 0.076 | 0.047 | 0.023  | 0.034   | 0.037 | 0.029 | 0.019       | 0.031  | 0.021 | 0.022       | 0.023 |

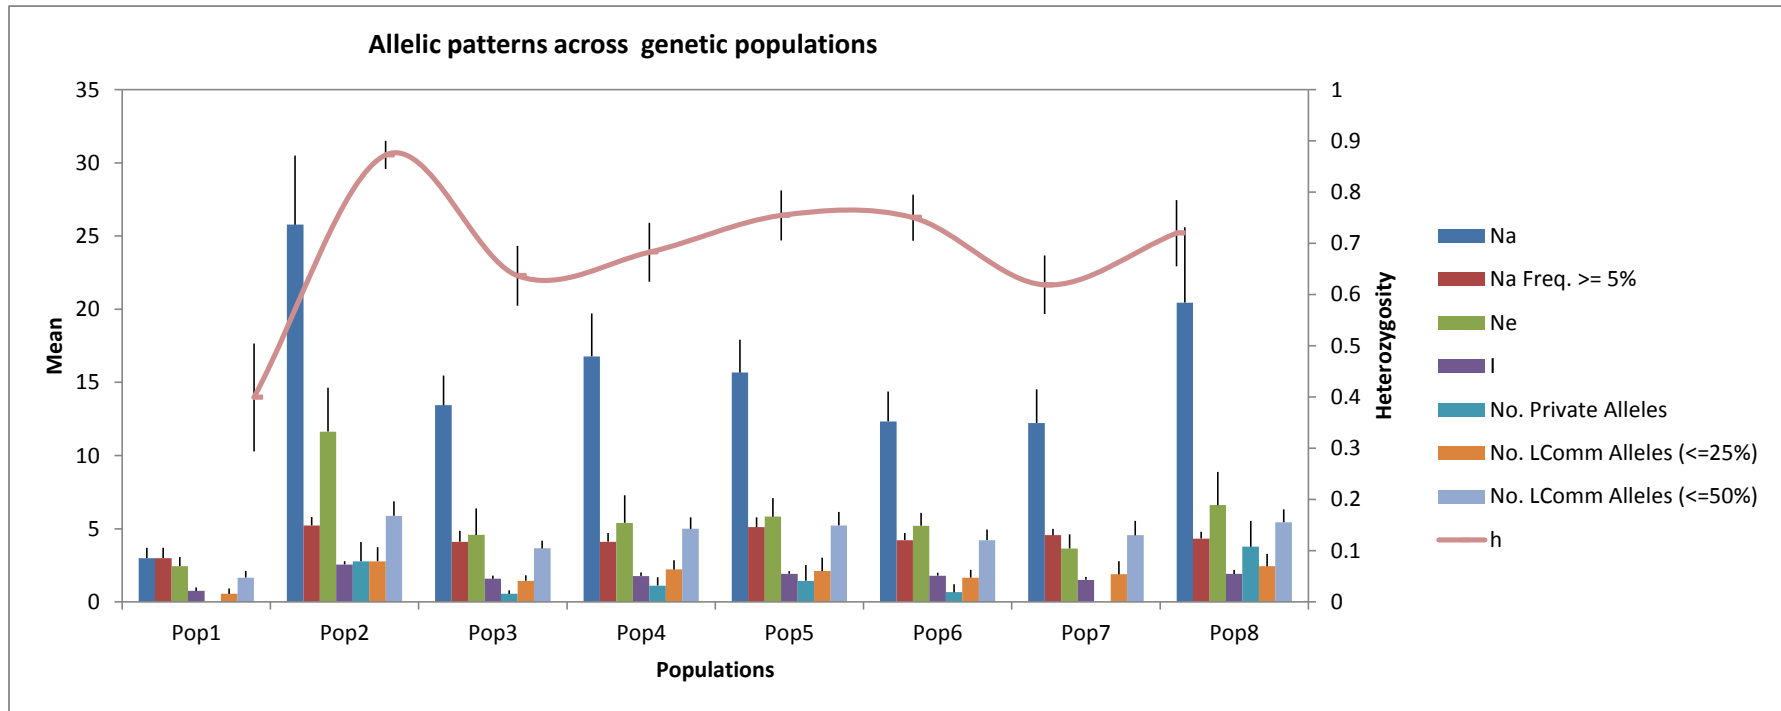

**Mean values**

| <b>Population</b>                   | <b>Pop1</b> | <b>Pop2</b> | <b>Pop3</b> | <b>Pop4</b> | <b>Pop5</b> | <b>Pop6</b> | <b>Pop7</b> | <b>Pop8</b> |
|-------------------------------------|-------------|-------------|-------------|-------------|-------------|-------------|-------------|-------------|
| <b>Na</b>                           | 3.000       | 25.778      | 13.444      | 16.778      | 15.667      | 12.333      | 12.222      | 20.444      |
| <b>Na Freq. &gt;= 5%</b>            | 3.000       | 5.222       | 4.111       | 4.111       | 5.111       | 4.222       | 4.556       | 4.333       |
| <b>Ne</b>                           | 2.445       | 11.634      | 4.579       | 5.399       | 5.828       | 5.202       | 3.650       | 6.616       |
| <b>I</b>                            | 0.756       | 2.558       | 1.581       | 1.770       | 1.924       | 1.796       | 1.515       | 1.909       |
| <b>No. Private Alleles</b>          | 0.000       | 2.778       | 0.556       | 1.111       | 1.444       | 0.667       | 0.000       | 3.778       |
| <b>No. LComm Alleles (&lt;=25%)</b> | 0.556       | 2.778       | 1.444       | 2.222       | 2.111       | 1.667       | 1.889       | 2.444       |
| <b>No. LComm Alleles (&lt;=50%)</b> | 1.667       | 5.889       | 3.667       | 5.000       | 5.222       | 4.222       | 4.556       | 5.444       |
| <b>h</b>                            | 0.399       | 0.872       | 0.637       | 0.683       | 0.754       | 0.750       | 0.619       | 0.720       |
| <b>uh</b>                           | 0.456       | 0.876       | 0.644       | 0.687       | 0.758       | 0.759       | 0.624       | 0.722       |

**Standard Error (SE) values**

| <b>Population</b>                   | <b>Pop1</b> | <b>Pop2</b> | <b>Pop3</b> | <b>Pop4</b> | <b>Pop5</b> | <b>Pop6</b> | <b>Pop7</b> | <b>Pop8</b> |
|-------------------------------------|-------------|-------------|-------------|-------------|-------------|-------------|-------------|-------------|
| <b>Na</b>                           | 0.707       | 4.725       | 2.015       | 2.938       | 2.242       | 2.041       | 2.296       | 5.140       |
| <b>Na Freq. &gt;= 5%</b>            | 0.707       | 0.572       | 0.754       | 0.588       | 0.676       | 0.494       | 0.444       | 0.471       |
| <b>Ne</b>                           | 0.625       | 3.004       | 1.813       | 1.883       | 1.265       | 0.894       | 0.969       | 2.259       |
| <b>I</b>                            | 0.227       | 0.215       | 0.209       | 0.250       | 0.189       | 0.204       | 0.201       | 0.280       |
| <b>No. Private Alleles</b>          | 0.000       | 1.310       | 0.242       | 0.588       | 1.082       | 0.553       | 0.000       | 1.762       |
| <b>No. LComm Alleles (&lt;=25%)</b> | 0.377       | 0.969       | 0.377       | 0.619       | 0.920       | 0.527       | 0.904       | 0.835       |
| <b>No. LComm Alleles (&lt;=50%)</b> | 0.471       | 0.992       | 0.527       | 0.782       | 0.940       | 0.722       | 0.973       | 0.884       |
| <b>h</b>                            | 0.105       | 0.027       | 0.059       | 0.058       | 0.049       | 0.045       | 0.057       | 0.065       |
| <b>uh</b>                           | 0.120       | 0.028       | 0.059       | 0.058       | 0.049       | 0.046       | 0.058       | 0.065       |
