# Supplementary material for: Global Population Genetic Analysis of Aspergillus fumigatus
Source: PubMed Central journal article supplement (PMC5288565; doi:10.1128/msphere.00019-17), 2017-02-01
Supplement: sph001172230sf4.pdf [file sph001172230sf4.pdf]

**Results of Analysis of Molecular Variance**

|                         |                    |
|-------------------------|--------------------|
| <b>Data Sheet</b>       | File S4            |
| <b>Data Title</b>       | Gen Pop separation |
| <b>No. Samples</b>      | 1230               |
| <b>No. Pops</b>         | 8                  |
| <b>No. Permutations</b> | 999                |
| <b>NO</b>               | 146.213            |
| <b>SSTOT</b>            | 4830.342           |

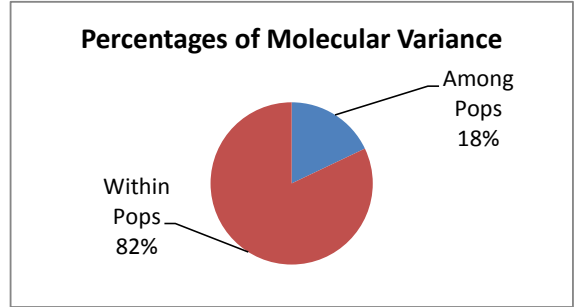

| Pop         | Pop1   | Pop2    | Pop3    | Pop4    | Pop5    | Pop6    | Pop7    | Pop8     |
|-------------|--------|---------|---------|---------|---------|---------|---------|----------|
| <b>n</b>    | 8      | 230     | 95      | 165     | 206     | 90      | 120     | 316      |
| <b>SSWP</b> | 14.375 | 906.652 | 273.526 | 507.527 | 699.500 | 303.944 | 334.200 | 1023.630 |

**Summary AMOVA Table**

| Source             | df   | SS       | MS      | Est. Var. | %    |
|--------------------|------|----------|---------|-----------|------|
| <b>Among Pops</b>  | 7    | 766.987  | 109.570 | 0.727     | 18%  |
| <b>Within Pops</b> | 1222 | 4063.355 | 3.325   | 3.325     | 82%  |
| <b>Total</b>       | 1229 | 4830.342 |         | 4.052     | 100% |

**Stat Value** P(rand >= data) Probability, P(rand >= data), for PhiPT is based on standard permutation across the full data set.

**PhiPT** 0.179 0.001 **PhiPT = AP / (WP + AP) = AP / TOT**

**PhiPT max** 0.263

**Phi'PT** 0.683

**Nm (Haploid)** 2.288 **Nm (Haploid) = [(1 / PhiPT) - 1] / 2**

Key: AP = Est. Var. Among Pops, WP = Est. Var. Within Pops

**Pairwise Population PhiPT Values**

| Pop1  | Pop2  | Pop3  | Pop4  | Pop5  | Pop6  | Pop7  | Pop8  |             |
|-------|-------|-------|-------|-------|-------|-------|-------|-------------|
|       | 0.001 | 0.001 | 0.001 | 0.001 | 0.001 | 0.001 | 0.001 | <b>Pop1</b> |
| 0.216 |       | 0.001 | 0.001 | 0.001 | 0.001 | 0.001 | 0.001 | <b>Pop2</b> |
| 0.373 | 0.135 |       | 0.001 | 0.001 | 0.001 | 0.001 | 0.001 | <b>Pop3</b> |
| 0.344 | 0.099 | 0.194 |       | 0.001 | 0.001 | 0.001 | 0.001 | <b>Pop4</b> |
| 0.247 | 0.104 | 0.220 | 0.180 |       | 0.001 | 0.001 | 0.001 | <b>Pop5</b> |
| 0.300 | 0.083 | 0.195 | 0.157 | 0.162 |       | 0.001 | 0.001 | <b>Pop6</b> |
| 0.365 | 0.152 | 0.257 | 0.244 | 0.144 | 0.202 |       | 0.001 | <b>Pop7</b> |
| 0.336 | 0.145 | 0.242 | 0.249 | 0.184 | 0.188 | 0.243 |       | <b>Pop8</b> |

PhiPT Values below diagonal. Probability, P(rand >= data) based on 999 permutations is shown above diagonal.
