# Supplementary material for: Global Population Genetic Analysis of Aspergillus fumigatus
Source: PubMed Central journal article supplement (PMC5288565; doi:10.1128/msphere.00019-17), 2017-02-01
Supplement: sph001172230sf5.pdf [file sph001172230sf5.pdf]

## File S5

| Sample ID | Population | 2A | 2B | 2C | 3A | 3B | 3C | 4A   | 4B | 4C | No. Matches | Label |
|-----------|------------|----|----|----|----|----|----|------|----|----|-------------|-------|
| 533       | Clinical   | 10 | 14 | 10 | 17 | 13 | 14 | 7    | 5  | 5  | 0           | A     |
| 1389      | Env        | 10 | 14 | 10 | 17 | 13 | 14 | 7    | 5  | 5  | 2           | A     |
| 738       | Clinical   | 18 | 12 | 11 | 16 | 10 | 13 | 8    | 9  | 5  | 0           | AA    |
| 186       | Air        | 18 | 12 | 11 | 16 | 10 | 13 | 8    | 9  | 5  | 2           | AA    |
| 957       | Clinical   | 19 | 22 | 21 | 34 | 10 | 29 | 14   | 9  | 7  | 0           | AAA   |
| 311       | Air        | 19 | 22 | 21 | 34 | 10 | 29 | 14   | 9  | 7  | 2           | AAA   |
| 1383      | Clinical   | 25 | 19 | 19 | 26 | 19 | 17 | 10   | 16 | 8  | 0           | AAAA  |
| 483       | Air        | 25 | 19 | 19 | 26 | 19 | 17 | 10   | 16 | 8  | 2           | AAAA  |
| 534       | Clinical   | 10 | 14 | 10 | 17 | 13 | 14 | 7    | 5  | 6  | 0           | B     |
| 10        | Air        | 10 | 14 | 10 | 17 | 13 | 14 | 7    | 5  | 6  | 2           | B     |
| 745       | Clinical   | 18 | 12 | 11 | 26 | 11 | 20 | 8    | 8  | 5  | 0           | BB    |
| 1460      | Env        | 18 | 12 | 11 | 26 | 11 | 20 | 8    | 8  | 5  | 2           | BB    |
| 994       | Clinical   | 19 | 25 | 34 | 34 | 23 | 26 | 10   | 10 | 5  | 0           | BBB   |
| 1519      | Env        | 19 | 25 | 34 | 34 | 23 | 26 | 10   | 10 | 5  | 2           | BBB   |
| 1268      | Clinical   | 25 | 20 | 11 | 10 | 9  | 7  | 8    | 10 | 20 | 0           | BBBB  |
| 492       | Air        | 25 | 20 | 11 | 10 | 9  | 7  | 8    | 10 | 20 | 2           | BBBB  |
| 536       | Clinical   | 10 | 14 | 10 | 17 | 13 | 15 | 7    | 5  | 5  | 0           | C     |
| 11        | Air        | 10 | 14 | 10 | 17 | 13 | 15 | 7    | 5  | 5  | 2           | C     |
| 750       | Clinical   | 18 | 12 | 13 | 14 | 10 | 12 | 8    | 9  | 5  | 0           | CC    |
| 1735      | Water      | 18 | 12 | 13 | 14 | 10 | 12 | 8    | 9  | 5  | 2           | CC    |
| 1021      | Clinical   | 20 | 17 | 16 | 39 | 11 | 22 | 12   | 11 | 8  | 0           | CCC   |
| 330       | Air        | 20 | 17 | 16 | 39 | 11 | 22 | 12   | 11 | 8  | 2           | CCC   |
| 1274      | Clinical   | 25 | 20 | 13 | 37 | 9  | 10 | 8    | 10 | 8  | 0           | CCCC  |
| 1575      | Env        | 25 | 20 | 13 | 37 | 9  | 10 | 8    | 10 | 8  | 2           | CCCC  |
| 538       | Clinical   | 10 | 15 | 10 | 18 | 12 | 12 | 7    | 5  | 6  | 0           | D     |
| 1592      | Soil       | 10 | 15 | 10 | 18 | 12 | 12 | 7    | 5  | 6  | 2           | D     |
| 756       | Clinical   | 18 | 12 | 14 | 14 | 14 | 14 | 19   | 10 | 5  | 0           | DD    |
| 197       | Air        | 18 | 12 | 14 | 14 | 14 | 14 | 19   | 10 | 5  | 2           | DD    |
| 1032      | Clinical   | 20 | 19 | 15 | 39 | 12 | 7  | 10   | 11 | 12 | 0           | DDD   |
| 333       | Air        | 20 | 19 | 15 | 39 | 12 | 7  | 10   | 11 | 12 | 2           | DDD   |
| 1256      | Clinical   | 25 | 20 | 8  | 10 | 10 | 21 | 9    | 10 | 5  | 0           | DDDD  |
| 1784      | Water      | 25 | 20 | 8  | 10 | 10 | 21 | 9    | 10 | 5  | 2           | DDDD  |
| 540       | Clinical   | 10 | 16 | 10 | 17 | 13 | 19 | 7    | 5  | 6  | 0           | E     |
| 20        | Air        | 10 | 16 | 10 | 17 | 13 | 19 | 7    | 5  | 6  | 2           | E     |
| 765       | Clinical   | 18 | 12 | 14 | 27 | 11 | 14 | 9    | 11 | 7  | 0           | EE    |
| 198       | Air        | 18 | 12 | 14 | 27 | 11 | 14 | 9    | 11 | 7  | 2           | EE    |
| 1035      | Clinical   | 20 | 19 | 15 | 40 | 12 | 7  | 10   | 11 | 12 | 0           | EEE   |
| 1529      | Env        | 20 | 19 | 15 | 40 | 12 | 7  | 10   | 11 | 12 | 2           | EEE   |
| 1257      | Clinical   | 25 | 20 | 8  | 10 | 10 | 22 | 9    | 10 | 5  | 0           | EEEE  |
| 486       | Air        | 25 | 20 | 8  | 10 | 10 | 22 | 9    | 10 | 5  | 2           | EEEE  |
| 542       | Clinical   | 10 | 16 | 10 | 22 | 12 | 12 | 7    | 5  | 5  | 0           | F     |
| 1595      | Soil       | 10 | 16 | 10 | 22 | 12 | 12 | 7    | 5  | 5  | 2           | F     |
| 784       | Clinical   | 18 | 12 | 16 | 26 | 11 | 20 | 8    | 8  | 7  | 0           | FF    |
| 206       | Air        | 18 | 12 | 16 | 26 | 11 | 20 | 8    | 8  | 7  | 2           | FF    |
| 1026      | Clinical   | 20 | 19 | 8  | 31 | 14 | 20 | 9    | 9  | 5  | 0           | FFF   |
| 1766      | Water      | 20 | 19 | 8  | 31 | 14 | 20 | 9    | 9  | 5  | 2           | FFF   |
| 1260      | Clinical   | 25 | 20 | 9  | 10 | 10 | 7  | 8    | 10 | 10 | 0           | FFFF  |
| 1785      | Water      | 25 | 20 | 9  | 10 | 10 | 7  | 8    | 10 | 10 | 2           | FFFF  |
| 545       | Clinical   | 10 | 16 | 10 | 23 | 13 | 21 | 7    | 5  | 6  | 0           | G     |
| 26        | Air        | 10 | 16 | 10 | 23 | 13 | 21 | 7    | 5  | 6  | 2           | G     |
| 785       | Clinical   | 18 | 12 | 17 | 25 | 10 | 21 | 8    | 9  | 7  | 0           | GG    |
| 1736      | Water      | 18 | 12 | 17 | 25 | 10 | 21 | 8    | 9  | 7  | 2           | GG    |
| 1061      | Clinical   | 21 | 22 | 18 | 26 | 10 | 14 | 9    | 13 | 8  | 0           | GGG   |
| 351       | Air        | 21 | 22 | 18 | 26 | 10 | 14 | 9    | 13 | 8  | 2           | GGG   |
| 1275      | Clinical   | 25 | 21 | 8  | 29 | 9  | 6  | 8    | 10 | 20 | 0           | GGGG  |
| 494       | Air        | 25 | 21 | 8  | 29 | 9  | 6  | 8    | 10 | 20 | 2           | GGGG  |
| 547       | Clinical   | 10 | 16 | 10 | 24 | 11 | 8  | 7    | 5  | 5  | 0           | H     |
| 30        | Air        | 10 | 16 | 10 | 24 | 11 | 8  | 7    | 5  | 5  | 2           | H     |
| 706       | Clinical   | 18 | 12 | 8  | 27 | 10 | 19 | 9    | 9  | 5  | 0           | HH    |
| 1730      | Water      | 18 | 12 | 8  | 27 | 10 | 19 | 9    | 9  | 5  | 2           | HH    |
| 1063      | Clinical   | 21 | 22 | 18 | 26 | 10 | 15 | 9    | 13 | 8  | 0           | HHH   |
| 1681      | Soil       | 21 | 22 | 18 | 26 | 10 | 15 | 9    | 13 | 8  | 2           | HHH   |
| 1295      | Clinical   | 25 | 22 | 19 | 28 | 9  | 26 | 10   | 9  | 5  | 0           | HHHH  |
| 1577      | Env        | 25 | 22 | 19 | 28 | 9  | 26 | 10   | 9  | 5  | 2           | HHHH  |
| 549       | Clinical   | 10 | 16 | 10 | 25 | 11 | 8  | 7    | 5  | 6  | 0           | I     |
| 1597      | Soil       | 10 | 16 | 10 | 25 | 11 | 8  | 7    | 5  | 6  | 2           | I     |
| 710       | Clinical   | 18 | 12 | 8  | 27 | 10 | 20 | 9    | 9  | 5  | 0           | II    |
| 1669      | Soil       | 18 | 12 | 8  | 27 | 10 | 20 | 9    | 9  | 5  | 2           | II    |
| 1070      | Clinical   | 21 | 25 | 18 | 27 | 12 | 7  | 20.3 | 10 | 8  | 0           | III   |
| 1682      | Soil       | 21 | 25 | 18 | 27 | 12 | 7  | 20.3 | 10 | 8  | 2           | III   |
| 1297      | Clinical   | 25 | 22 | 20 | 27 | 9  | 26 | 10   | 9  | 5  | 0           | IIII  |
| 508       | Air        | 25 | 22 | 20 | 27 | 9  | 26 | 10   | 9  | 5  | 2           | IIII  |
| 551       | Clinical   | 10 | 16 | 10 | 25 | 12 | 8  | 7    | 5  | 6  | 0           | J     |
| 33        | Air        | 10 | 16 | 10 | 25 | 12 | 8  | 7    | 5  | 6  | 2           | J     |
| 720       | Clinical   | 18 | 12 | 8  | 28 | 10 | 20 | 9    | 9  | 5  | 0           | JJ    |
| 1732      | Water      | 18 | 12 | 8  | 28 | 10 | 20 | 9    | 9  | 5  | 2           | JJ    |
| 1077      | Clinical   | 21 | 25 | 19 | 27 | 12 | 7  | 20.3 | 10 | 8  | 0           | JJJ   |
| 361       | Air        | 21 | 25 | 19 | 27 | 12 | 7  | 20.3 | 10 | 8  | 2           | JJJ   |
| 1300      | Clinical   | 25 | 26 | 9  | 10 | 10 | 7  | 9    | 9  | 5  | 0           | JJJJ  |
| 510       | Air        | 25 | 26 | 9  | 10 | 10 | 7  | 9    | 9  | 5  | 2           | JJJJ  |
| 554       | Clinical   | 10 | 16 | 10 | 26 | 12 | 8  | 7    | 5  | 6  | 0           | K     |
| 42        | Air        | 10 | 16 | 10 | 26 | 12 | 8  | 7    | 5  | 6  | 2           | K     |
| 721       | Clinical   | 18 | 12 | 8  | 28 | 10 | 21 | 9    | 9  | 5  | 0           | KK    |
| 170       | Air        | 18 | 12 | 8  | 28 | 10 | 21 | 9    | 9  | 5  | 2           | KK    |
| 1080      | Clinical   | 21 | 25 | 19 | 27 | 12 | 7  | 21   | 10 | 8  | 0           | KKK   |
| 363       | Air        | 21 | 25 | 19 | 27 | 12 | 7  | 21   | 10 | 8  | 2           | KKK   |
| 1313      | Clinical   | 26 | 20 | 8  | 25 | 9  | 7  | 8    | 10 | 10 | 0           | KKKK  |
| 517       | Air        | 26 | 20 | 8  | 25 | 9  | 7  | 8    | 10 | 10 | 2           | KKKK  |
| 556       | Clinical   | 10 | 16 | 10 | 30 | 13 | 21 | 7    | 5  | 5  | 0           | L     |
| 43        | Air        | 10 | 16 | 10 | 30 | 13 | 21 | 7    | 5  | 5  | 2           | L     |

|      |          |    |    |    |    |    |    |      |    |    |   |      |
|------|----------|----|----|----|----|----|----|------|----|----|---|------|
| 730  | Clinical | 18 | 12 | 8  | 31 | 10 | 20 | 9    | 9  | 5  | 0 | LL   |
| 178  | Air      | 18 | 12 | 8  | 31 | 10 | 20 | 9    | 9  | 5  | 2 | LL   |
| 1089 | Clinical | 22 | 19 | 15 | 37 | 11 | 21 | 10   | 26 | 5  | 0 | LLL  |
| 369  | Air      | 22 | 19 | 15 | 37 | 11 | 21 | 10   | 26 | 5  | 2 | LLL  |
| 1317 | Clinical | 26 | 20 | 8  | 35 | 9  | 7  | 8    | 10 | 20 | 0 | LLLL |
| 518  | Air      | 26 | 20 | 8  | 35 | 9  | 7  | 8    | 10 | 20 | 2 | LLLL |
| 557  | Clinical | 10 | 16 | 10 | 31 | 13 | 21 | 7    | 5  | 5  | 0 | M    |
| 44   | Air      | 10 | 16 | 10 | 31 | 13 | 21 | 7    | 5  | 5  | 2 | M    |
| 816  | Clinical | 18 | 17 | 16 | 36 | 21 | 24 | 15.3 | 9  | 8  | 0 | MM   |
| 1474 | Env      | 18 | 17 | 16 | 36 | 21 | 24 | 15.3 | 9  | 8  | 2 | MM   |
| 1101 | Clinical | 23 | 16 | 8  | 56 | 10 | 20 | 12.3 | 10 | 8  | 0 | MMM  |
| 375  | Air      | 23 | 16 | 8  | 56 | 10 | 20 | 12.3 | 10 | 8  | 2 | MMM  |
| 575  | Clinical | 11 | 12 | 17 | 25 | 22 | 21 | 14   | 8  | 5  | 0 | N    |
| 1706 | Water    | 11 | 12 | 17 | 25 | 22 | 21 | 14   | 8  | 5  | 2 | N    |
| 836  | Clinical | 18 | 19 | 11 | 27 | 10 | 34 | 20   | 11 | 5  | 0 | NN   |
| 1748 | Water    | 18 | 19 | 11 | 27 | 10 | 34 | 20   | 11 | 5  | 2 | NN   |
| 1117 | Clinical | 23 | 19 | 15 | 47 | 11 | 7  | 13   | 9  | 5  | 0 | NNN  |
| 388  | Air      | 23 | 19 | 15 | 47 | 11 | 7  | 13   | 9  | 5  | 2 | NNN  |
| 588  | Clinical | 11 | 14 | 14 | 27 | 11 | 5  | 15   | 8  | 7  | 0 | O    |
| 1407 | Env      | 11 | 14 | 14 | 27 | 11 | 5  | 15   | 8  | 7  | 2 | O    |
| 843  | Clinical | 18 | 19 | 11 | 27 | 10 | 35 | 20   | 11 | 5  | 0 | OO   |
| 244  | Air      | 18 | 19 | 11 | 27 | 10 | 35 | 20   | 11 | 5  | 2 | OO   |
| 1125 | Clinical | 23 | 19 | 15 | 48 | 11 | 7  | 13   | 9  | 5  | 0 | OOO  |
| 394  | Air      | 23 | 19 | 15 | 48 | 11 | 7  | 13   | 9  | 5  | 2 | OOO  |
| 593  | Clinical | 13 | 10 | 9  | 10 | 11 | 9  | 8    | 9  | 19 | 0 | P    |
| 1410 | Env      | 13 | 10 | 9  | 10 | 11 | 9  | 8    | 9  | 19 | 2 | P    |
| 819  | Clinical | 18 | 19 | 8  | 10 | 10 | 20 | 9    | 9  | 10 | 0 | PP   |
| 224  | Air      | 18 | 19 | 8  | 10 | 10 | 20 | 9    | 9  | 10 | 2 | PP   |
| 1130 | Clinical | 23 | 19 | 15 | 49 | 11 | 7  | 13   | 9  | 5  | 0 | PPP  |
| 1548 | Env      | 23 | 19 | 15 | 49 | 11 | 7  | 13   | 9  | 5  | 2 | PPP  |
| 600  | Clinical | 13 | 19 | 8  | 22 | 10 | 10 | 9    | 10 | 21 | 0 | Q    |
| 1708 | Water    | 13 | 19 | 8  | 22 | 10 | 10 | 9    | 10 | 21 | 2 | Q    |
| 824  | Clinical | 18 | 19 | 8  | 25 | 23 | 20 | 15   | 9  | 5  | 0 | QQ   |
| 228  | Air      | 18 | 19 | 8  | 25 | 23 | 20 | 15   | 9  | 5  | 2 | QQ   |
| 1136 | Clinical | 23 | 19 | 15 | 50 | 11 | 7  | 13   | 9  | 5  | 0 | QQQ  |
| 405  | Air      | 23 | 19 | 15 | 50 | 11 | 7  | 13   | 9  | 5  | 2 | QQQ  |
| 622  | Clinical | 14 | 12 | 9  | 26 | 10 | 20 | 8    | 8  | 10 | 0 | R    |
| 1417 | Env      | 14 | 12 | 9  | 26 | 10 | 20 | 8    | 8  | 10 | 2 | R    |
| 830  | Clinical | 18 | 19 | 8  | 28 | 14 | 21 | 9    | 9  | 5  | 0 | RR   |
| 1742 | Water    | 18 | 19 | 8  | 28 | 14 | 21 | 9    | 9  | 5  | 2 | RR   |
| 1150 | Clinical | 23 | 19 | 16 | 29 | 17 | 7  | 10   | 26 | 5  | 0 | RRR  |
| 1549 | Env      | 23 | 19 | 16 | 29 | 17 | 7  | 10   | 26 | 5  | 2 | RRR  |
| 646  | Clinical | 14 | 20 | 11 | 34 | 9  | 7  | 8    | 10 | 12 | 0 | S    |
| 1427 | Env      | 14 | 20 | 11 | 34 | 9  | 7  | 8    | 10 | 12 | 2 | S    |
| 853  | Clinical | 18 | 20 | 9  | 10 | 10 | 12 | 8    | 10 | 5  | 0 | SS   |
| 1749 | Water    | 18 | 20 | 9  | 10 | 10 | 12 | 8    | 10 | 5  | 2 | SS   |
| 1153 | Clinical | 23 | 19 | 16 | 30 | 17 | 7  | 10   | 26 | 5  | 0 | SSS  |
| 411  | Air      | 23 | 19 | 16 | 30 | 17 | 7  | 10   | 26 | 5  | 2 | SSS  |
| 640  | Clinical | 14 | 20 | 8  | 36 | 13 | 10 | 8    | 10 | 5  | 0 | T    |
| 118  | Air      | 14 | 20 | 8  | 36 | 13 | 10 | 8    | 10 | 5  | 2 | T    |
| 872  | Clinical | 18 | 21 | 19 | 22 | 11 | 31 | 10   | 8  | 8  | 0 | TT   |
| 1751 | Water    | 18 | 21 | 19 | 22 | 11 | 31 | 10   | 8  | 8  | 2 | TT   |
| 1154 | Clinical | 23 | 19 | 16 | 44 | 20 | 7  | 13.3 | 9  | 7  | 0 | TTT  |
| 415  | Air      | 23 | 19 | 16 | 44 | 20 | 7  | 13.3 | 9  | 7  | 2 | TTT  |
| 1350 | Clinical | 14 | 20 | 9  | 31 | 9  | 10 | 8    | 10 | 28 | 0 | U    |
| 1658 | Soil     | 14 | 20 | 9  | 31 | 9  | 10 | 8    | 10 | 28 | 2 | U    |
| 876  | Clinical | 18 | 21 | 27 | 62 | 11 | 30 | 17.3 | 9  | 5  | 0 | UU   |
| 1498 | Env      | 18 | 21 | 27 | 62 | 11 | 30 | 17.3 | 9  | 5  | 2 | UU   |
| 1177 | Clinical | 23 | 21 | 8  | 48 | 9  | 6  | 8    | 9  | 5  | 0 | UUU  |
| 433  | Air      | 23 | 21 | 8  | 48 | 9  | 6  | 8    | 9  | 5  | 2 | UUU  |
| 666  | Clinical | 15 | 19 | 8  | 26 | 10 | 7  | 8    | 9  | 5  | 0 | V    |
| 1720 | Water    | 15 | 19 | 8  | 26 | 10 | 7  | 8    | 9  | 5  | 2 | V    |
| 924  | Clinical | 18 | 25 | 19 | 28 | 11 | 7  | 17.3 | 10 | 8  | 0 | VV   |
| 1511 | Env      | 18 | 25 | 19 | 28 | 11 | 7  | 17.3 | 10 | 8  | 2 | VV   |
| 1199 | Clinical | 23 | 23 | 15 | 38 | 11 | 49 | 10   | 26 | 8  | 0 | VVV  |
| 444  | Air      | 23 | 23 | 15 | 38 | 11 | 49 | 10   | 26 | 8  | 2 | VVV  |
| 667  | Clinical | 15 | 19 | 8  | 33 | 15 | 20 | 9    | 10 | 5  | 0 | W    |
| 136  | Air      | 15 | 19 | 8  | 33 | 15 | 20 | 9    | 10 | 5  | 2 | W    |
| 932  | Clinical | 18 | 28 | 8  | 16 | 10 | 18 | 8    | 9  | 5  | 0 | WW   |
| 1755 | Water    | 18 | 28 | 8  | 16 | 10 | 18 | 8    | 9  | 5  | 2 | WW   |
| 1216 | Clinical | 23 | 24 | 15 | 48 | 13 | 7  | 10   | 9  | 5  | 0 | WWW  |
| 1691 | Soil     | 23 | 24 | 15 | 48 | 13 | 7  | 10   | 9  | 5  | 2 | WWW  |
| 668  | Clinical | 15 | 19 | 8  | 34 | 15 | 20 | 9    | 10 | 5  | 0 | X    |
| 1722 | Water    | 15 | 19 | 8  | 34 | 15 | 20 | 9    | 10 | 5  | 2 | X    |
| 943  | Clinical | 19 | 12 | 12 | 25 | 25 | 35 | 12   | 12 | 5  | 0 | XX   |
| 295  | Air      | 19 | 12 | 12 | 25 | 25 | 35 | 12   | 12 | 5  | 2 | XX   |
| 1381 | Clinical | 25 | 10 | 8  | 86 | 9  | 12 | 8    | 7  | 5  | 0 | XXX  |
| 1695 | Soil     | 25 | 10 | 8  | 86 | 9  | 12 | 8    | 7  | 5  | 2 | XXX  |
| 670  | Clinical | 15 | 19 | 9  | 10 | 10 | 13 | 9    | 10 | 5  | 0 | Y    |
| 1723 | Water    | 15 | 19 | 9  | 10 | 10 | 13 | 9    | 10 | 5  | 2 | Y    |
| 944  | Clinical | 19 | 12 | 15 | 17 | 25 | 12 | 16   | 10 | 5  | 0 | YY   |
| 297  | Air      | 19 | 12 | 15 | 17 | 25 | 12 | 16   | 10 | 5  | 2 | YY   |
| 1242 | Clinical | 25 | 16 | 23 | 22 | 11 | 20 | 12   | 11 | 8  | 0 | YYY  |
| 476  | Air      | 25 | 16 | 23 | 22 | 11 | 20 | 12   | 11 | 8  | 2 | YYY  |
| 687  | Clinical | 17 | 12 | 13 | 16 | 10 | 22 | 8    | 8  | 8  | 0 | Z    |
| 147  | Air      | 17 | 12 | 13 | 16 | 10 | 22 | 8    | 8  | 8  | 2 | Z    |
| 956  | Clinical | 19 | 22 | 21 | 33 | 10 | 29 | 14   | 9  | 7  | 0 | ZZ   |
| 310  | Air      | 19 | 22 | 21 | 33 | 10 | 29 | 14   | 9  | 7  | 2 | ZZ   |
| 1250 | Clinical | 25 | 19 | 16 | 26 | 13 | 7  | 10   | 16 | 8  | 0 | ZZZ  |
| 1700 | Soil     | 25 | 19 | 16 | 26 | 13 | 7  | 10   | 16 | 8  | 2 | ZZZ  |
